# Supplementary material for: On Intensive Late Holocene Iron Mining and Production in the Northern Congo Basin and the Environmental Consequences Associated with Metallurgy in Central Africa
Source: PubMed Central journal article supplement (PMC4498739; doi:10.1371/journal.pone.0132632), 2015-07-10
Supplement: pone.0132632.s004.pdf [file pone.0132632.s004.pdf]

**S1 Table. Summary of major pollen groups and selected taxa as a percent of the total pollen sum in each sample.**

| GROUPS/TAXA                     | FAMILY                   | FS4.40       | FS4.33       | FS4.25       | FS4.15       | FS4.09       |
|---------------------------------|--------------------------|--------------|--------------|--------------|--------------|--------------|
| <i>PALMAE - ARECACEAE</i>       |                          | <b>3.26</b>  | <b>6.28</b>  | <b>3.89</b>  | <b>8.19</b>  | <b>4.46</b>  |
| Borassus/Hyphaene               | PALMAE                   | 0.5          | 0.25         | 0.73         | 3.23         | 0.99         |
| Elaeisguineensis                | PALMAE                   | 0.75         | 1.76         | 0.73         | 1.24         | 1.49         |
| Phoenix                         | PALMAE                   | 0            | 0            | 0.49         | 1.49         | 0            |
| Raphia                          | PALMAE                   | 2.01         | 2.76         | 1.7          | 1.24         | 1.73         |
| <i>HERBACEOUS</i>               |                          | <b>8.02</b>  | <b>25.88</b> | <b>15.82</b> | <b>19.85</b> | <b>22.77</b> |
| Poaceaeundiff.                  | POACEAE                  | 3.51         | 16.08        | 8.52         | 12.66        | 16.34        |
| Poaceae-Damaged                 | POACEAE                  | 0.75         | 4.52         | 1.46         | 4.22         | 1.24         |
| Cyperaceaeundiff.               | CYPERACEAE               | 1.75         | 2.51         | 4.38         | 1.49         | 2.97         |
| <i>LIANAS</i>                   |                          | <b>1.01</b>  | <b>1.00</b>  | <b>2.68</b>  | <b>1.98</b>  | <b>0.00</b>  |
| Stephania/Tiliacora             | MENISPERMIACEAE          | 0.5          | 1.01         | 2.68         | 1.49         | 0            |
| <i>GCRF-WOODLAND MOSAIC</i>     |                          | <b>9.27</b>  | <b>4.02</b>  | <b>6.33</b>  | <b>10.17</b> | <b>4.7</b>   |
| Blighia                         | SAPINDACEAE              | 2.01         | 0.25         | 0.97         | 3.23         | 0.25         |
| Vitex-type                      | VERBENACEAE              | 0.5          | 0.5          | 1.95         | 2.23         | 0.5          |
| <i>MIXED GC RF</i>              |                          | <b>4.26</b>  | <b>5.53</b>  | <b>3.41</b>  | <b>2.98</b>  | <b>8.66</b>  |
| Antiaris/Milicia/Morus          | MORACEAE                 | 1.25         | 2.01         | 0.24         | 0.25         | 2.97         |
| Olax                            | OLACACEAE                | 0.25         | 0.5          | 0.97         | 0.99         | 2.72         |
| <i>PIONEER TREE-SHRUB</i>       |                          | <b>29.32</b> | <b>15.83</b> | <b>26.76</b> | <b>19.6</b>  | <b>13.86</b> |
| Lannea/Sclerocarya              | ANACARDIACEAE            | 3.01         | 0.5          | 1.95         | 1.74         | 0.25         |
| Macaranga/Mallotus/Mareya       | EUPHORBIACEAE            | 5.26         | 3.52         | 4.38         | 2.73         | 1.73         |
| Alchornea                       | EUPHORBIACEAE            | 9.02         | 4.27         | 11.92        | 5.21         | 8.91         |
| Nauclea-type                    | RUBIACEAE                | 4.26         | 4.27         | 3.89         | 3.97         | 0.5          |
| Trema-type orientalis           | ULMACEAE                 | 3.01         | 0.25         | 0.97         | 1.74         | 0.25         |
| <i>RIPARIAN GC RF</i>           |                          | <b>19.55</b> | <b>15.83</b> | <b>12.41</b> | <b>16.13</b> | <b>14.85</b> |
| Entada/Prosopis/Piptadeniastrum | FABACEAE -<br>MIMOSACEAE | 2.01         | 0.75         | 0.49         | 0.74         | 2.23         |
| Irvingia/Klainedoxa             | IRVINGIACEAE             | 1.5          | 0            | 1.22         | 2.23         | 0.5          |

|                         |                |              |              |              |              |              |
|-------------------------|----------------|--------------|--------------|--------------|--------------|--------------|
| Lophira                 | OCHNACEAE      | 1.25         | 2.26         | 1.7          | 2.48         | 1.98         |
| Uapaca                  | PHYLLANTHACEAE | 11.78        | 8.79         | 2.68         | 6.7          | 5.45         |
| <i>SECONDARY FOREST</i> |                | <b>15.54</b> | <b>9.8</b>   | <b>14.36</b> | <b>11.41</b> | <b>16.58</b> |
| Terminalia              | COMBRETACEAE   | 3.01         | 0.75         | 1.95         | 0.99         | 2.97         |
| Celtis                  | CANNABACEAE    | 2.51         | 3.77         | 4.62         | 3.47         | 3.22         |
| Musanga/Myrianthus      | MORACEAE       | 9.02         | 3.52         | 6.33         | 5.96         | 8.42         |
| <i>VARIOUS</i>          |                | <b>4.01</b>  | <b>3.51</b>  | <b>4.01</b>  | <b>3.76</b>  | <b>7.77</b>  |
| Moraceaeundiff.         | MORACEAE       | 2.01         | 0.25         | 0            | 0.25         | 4.21         |
| Sapotaceaeundiff.       | SAPOTACEAE     | 0.5          | 0.5          | 0.49         | 0.25         | 0.5          |
| <i>INDETERMINATE</i>    |                | <b>5.76</b>  | <b>12.32</b> | <b>10.33</b> | <b>5.93</b>  | <b>6.35</b>  |
