# Supplementary material for: On Intensive Late Holocene Iron Mining and Production in the Northern Congo Basin and the Environmental Consequences Associated with Metallurgy in Central Africa
Source: PLoS One. 2015 Jul 10;10(7):e0132632. doi: 10.1371/journal.pone.0132632 (PMC4498739; doi:10.1371/journal.pone.0132632)
Supplement: S1 Text — (PDF) [file pone.0132632.s005.pdf]

## Résumé

Une question en cours dans les reconstitutions paléoenvironnementales de la forêt d'Afrique centrale concerne le rôle que la métallurgie préhistorique a joué dans l'élaboration de la végétation forestière. Nous rapportons ici la preuve de l'exploitation minière intensive de minerai de fer et de la fonte dans les régions forestières du nord du bassin du Congo datant de l'Holocène. Estimations volumétriques sur extrait du minerai de fer et des monticules de scories associés de sites préhistoriques dans le sud de la République centrafricaine suggèrent la production de fer à grande échelle à égalité avec d'autres domaines de fabrication fer archéologiques et historiquement connus. Ces données documentent la première preuve d'exploitation du fer et la production intensive couvrant environ 90 ans avant l'occupation coloniale (circa AD 1889) et pendant un intervalle de temps qui est mal représenté dans l'enregistrement archéologique. Les zones de site supplémentaires pré-datant ces restes par 3-4 siècles reflètent une période antérieure de la production de fer sur une plus petite échelle. Micro-botanique prouve d'un échantillon de sédiments recueillis à partir d'un piège riverain adjacent indiquant une réduction des arbres d'ombrage adaptée de concert avec une augmentation des espèces héliophiles couvrant l'intervalle de temps associé à l'intensification de la ferrière. Ce changement se produit pendant le même intervalle de temps quand beaucoup de portions de l'Afrique centrale ont assisté à des transgressions forestières associées à un retour à des conditions plus humides commençant il y a 500 à 100 ans. Bien que les données présentées ici ne démontrent pas que les activités de fonderie de fer ont causé des changements de la végétation répandue en Afrique centrale, nous soutenons que l'exploitation minière et la fonte intense peuvent avoir des impacts localisés et un potentiel de région aux communautés végétales. Ces données démontrent en outre la valeur d'associer les analyses archéologiques et paléoenvironnementales de reconstituer l'histoire de la forêt à l'échelle régionale.
